# Supplementary figures and images for: Modeling osteoporosis to design and optimize pharmacological therapies comprising multiple drug types
Source: eLife journal article supplement (doi:10.7554/elife.76228), 2022-06-27

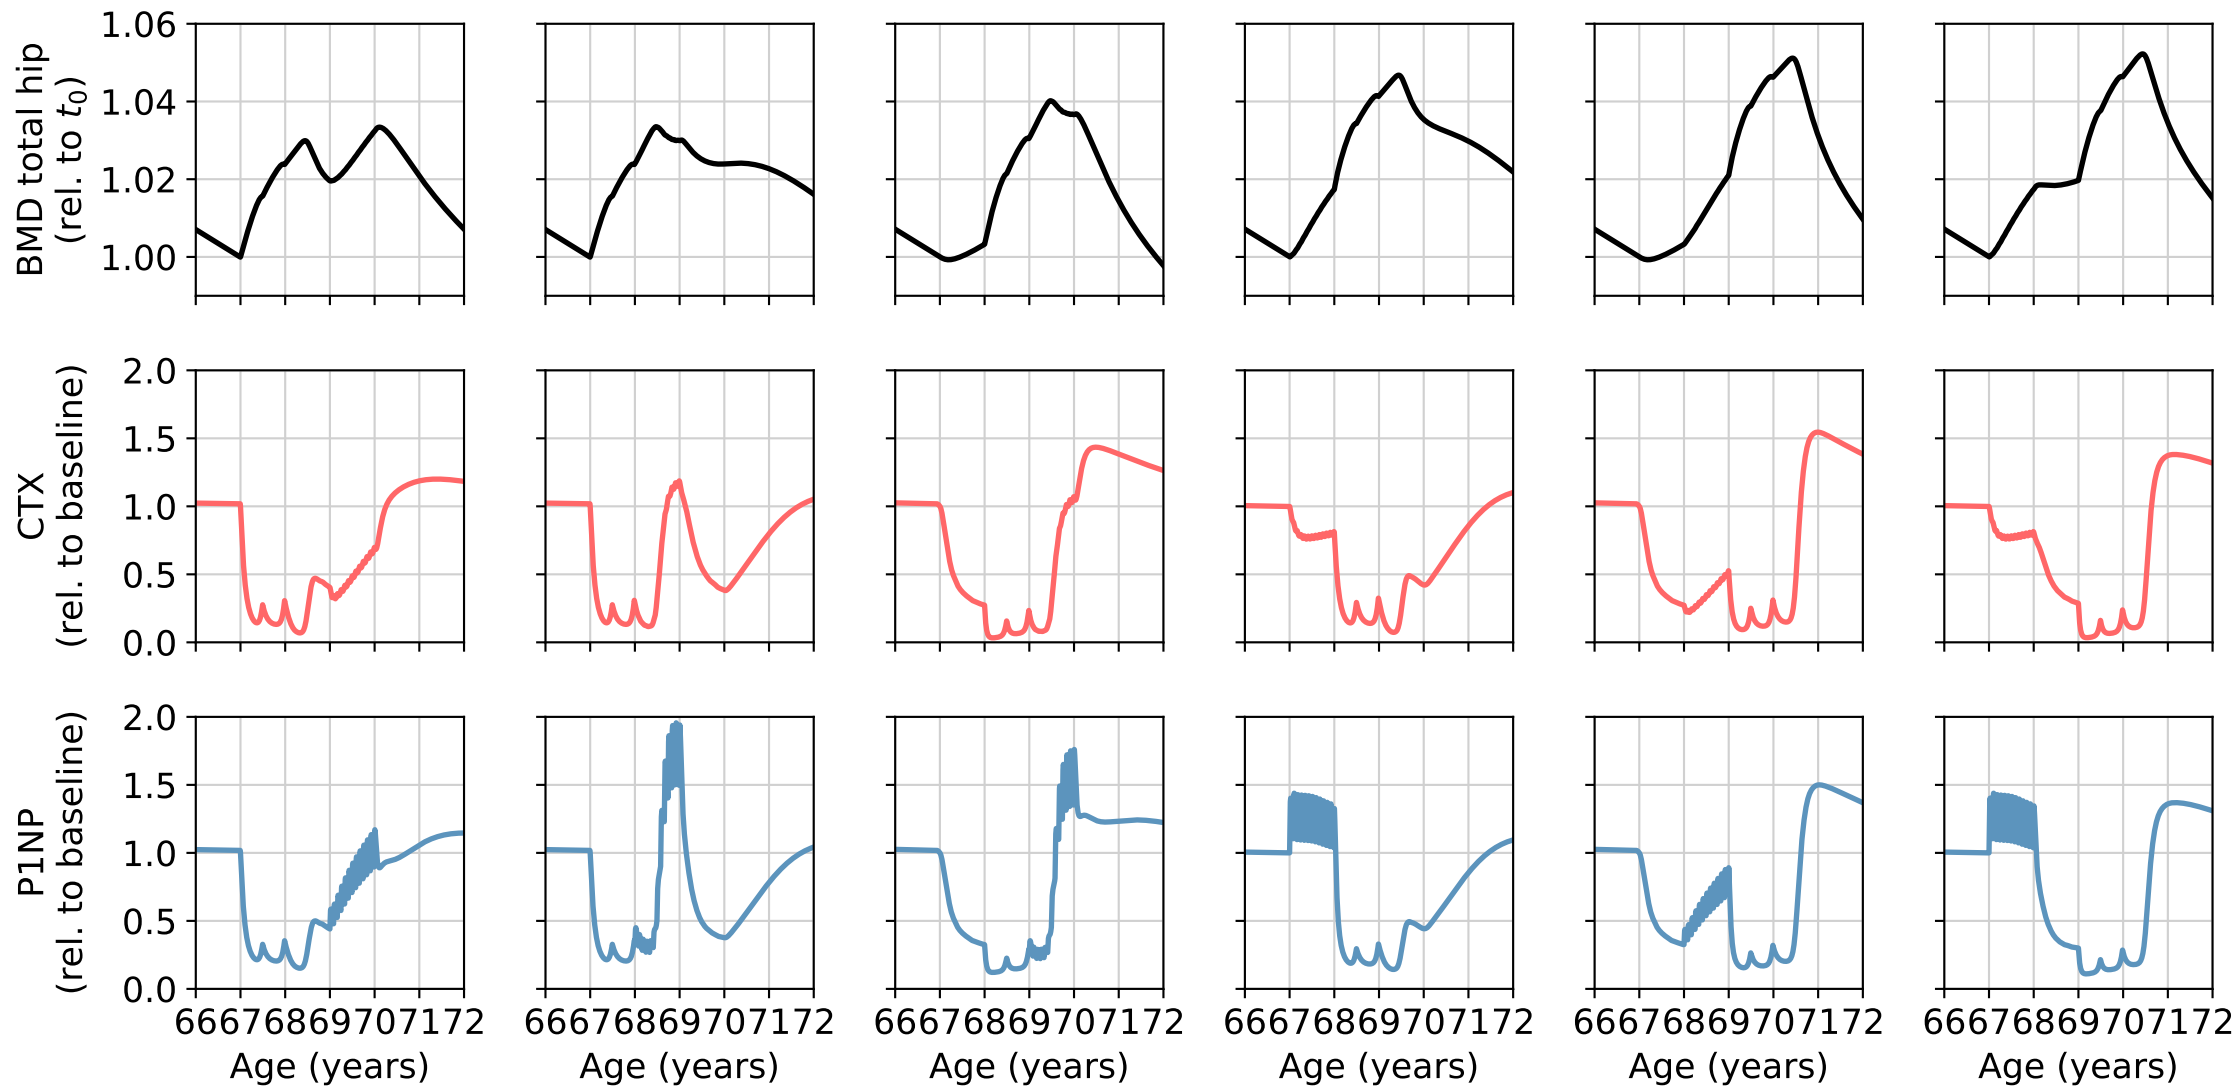

Supplement: code1 [file elife-76228-code1-v1.zip]

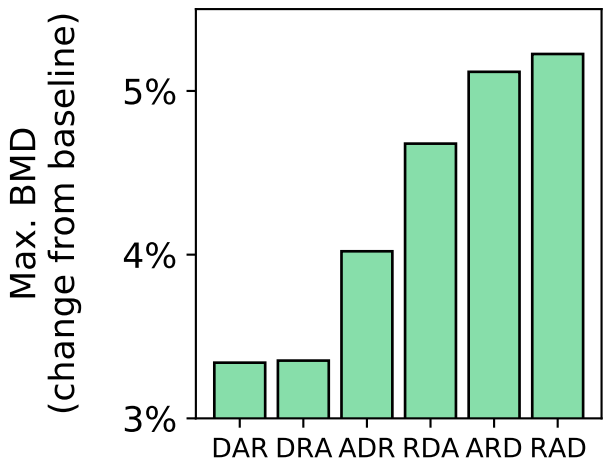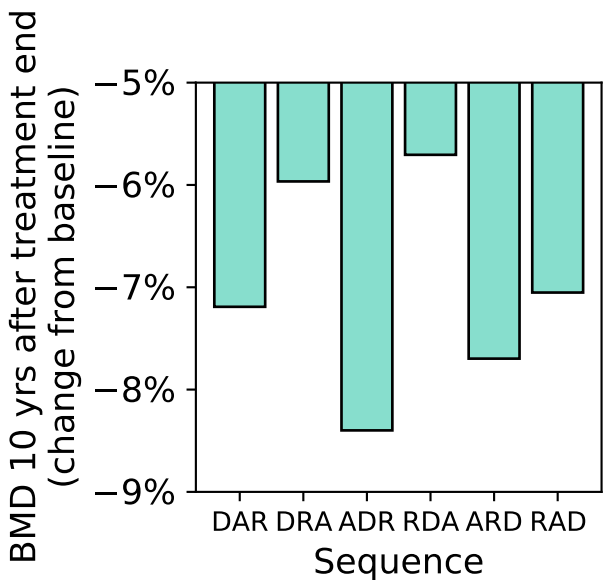

Supplement: code1 [file elife-76228-code1-v1.zip]

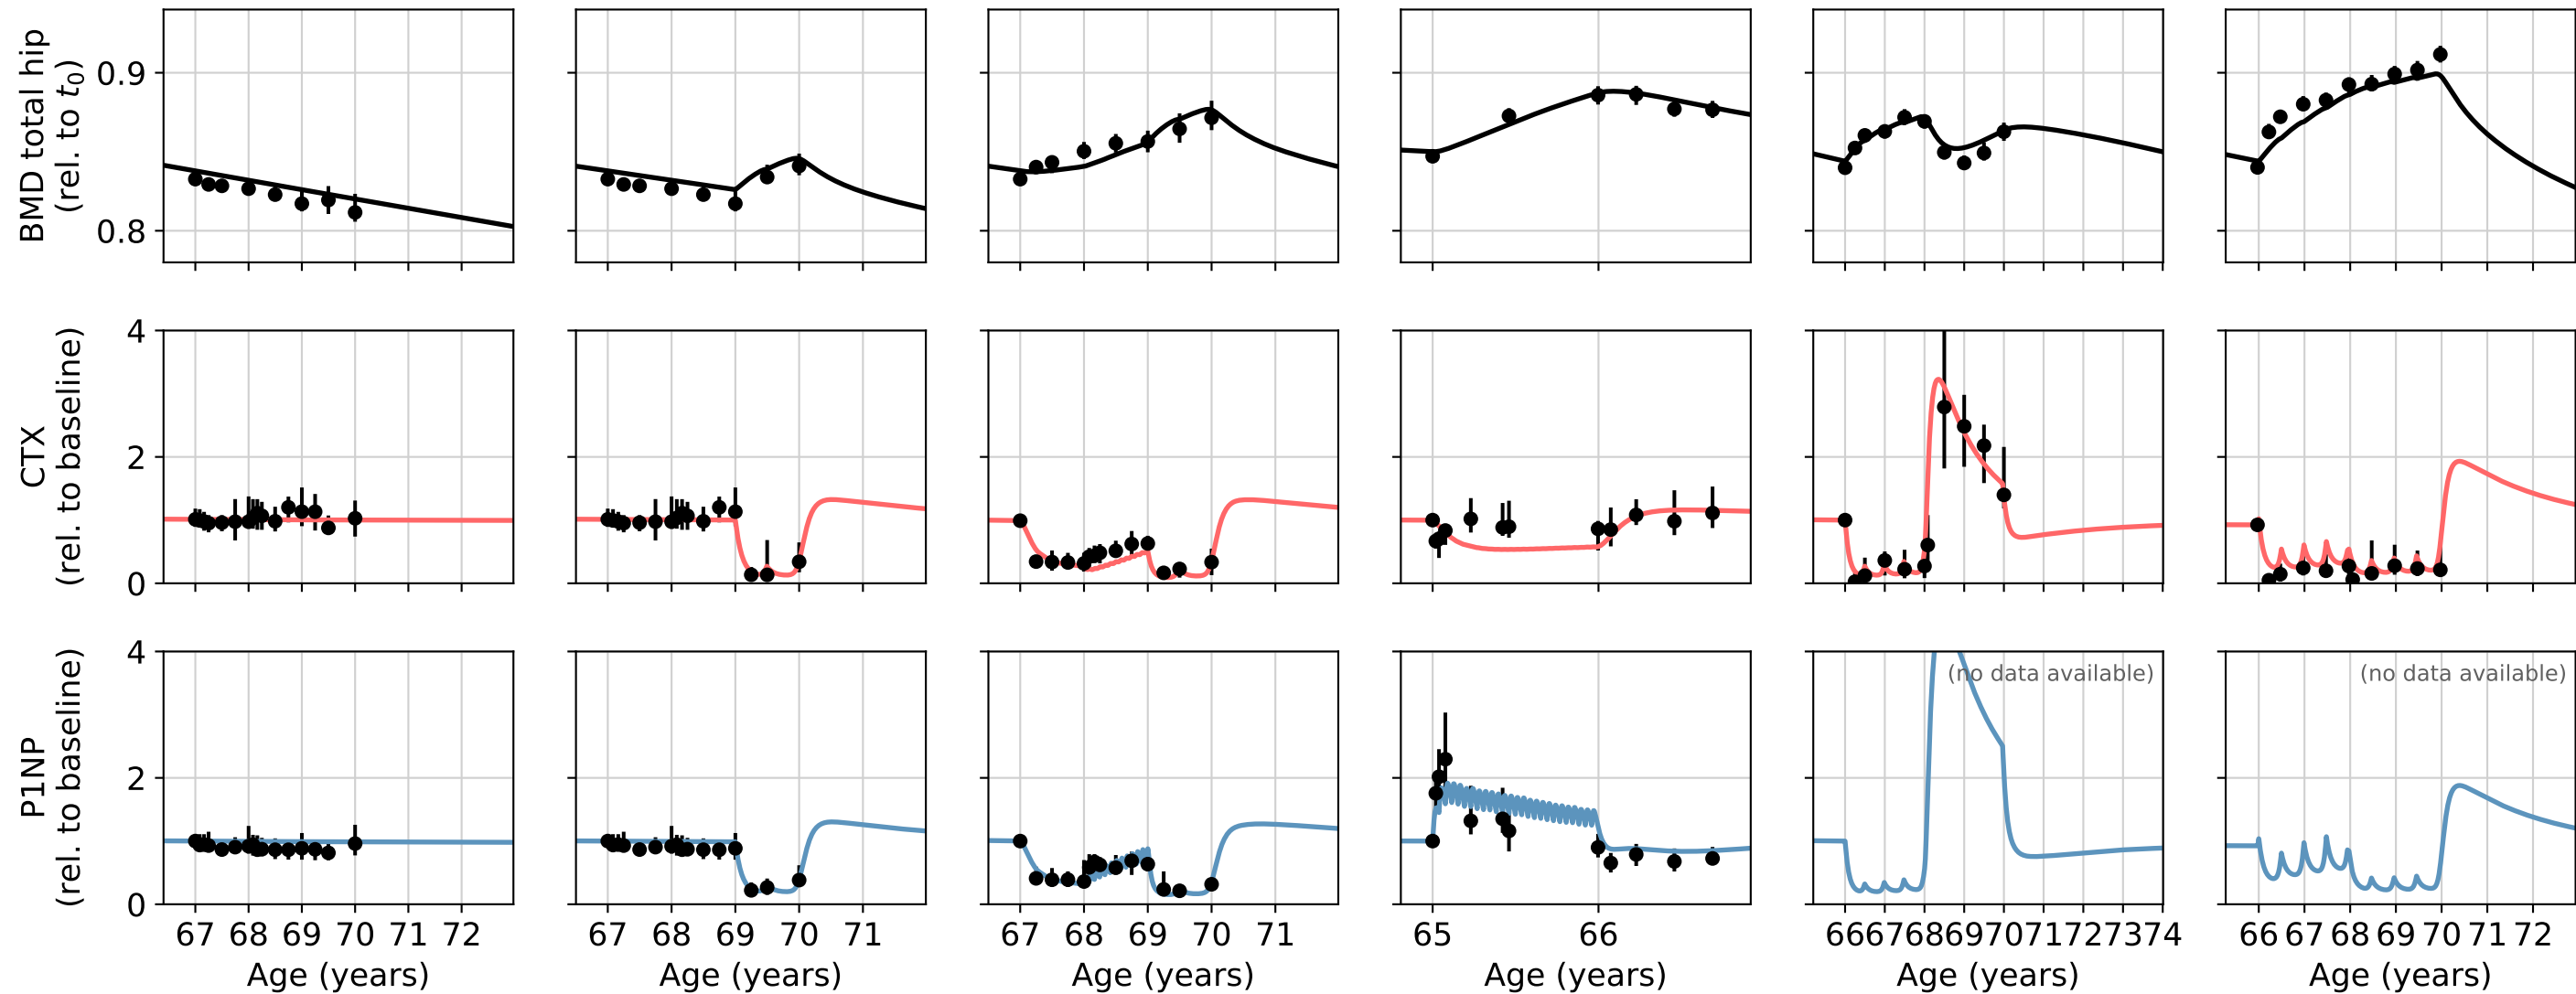

Supplement: code1 [file elife-76228-code1-v1.zip]

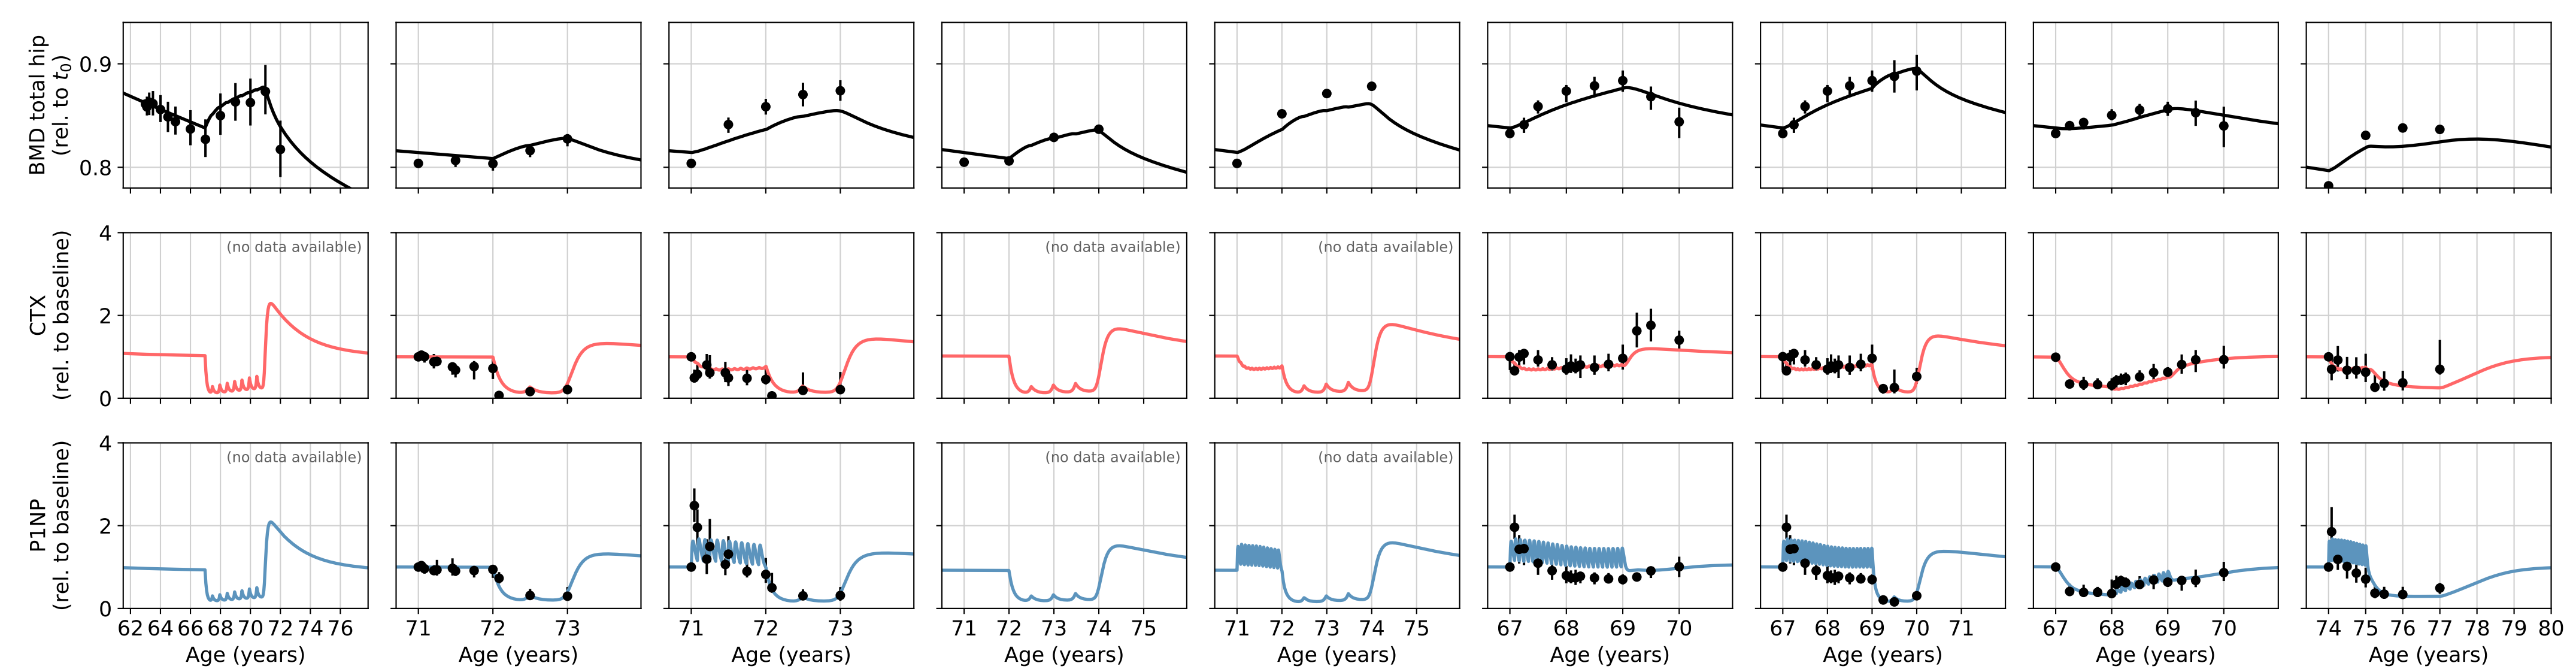

Supplement: code1 [file elife-76228-code1-v1.zip]

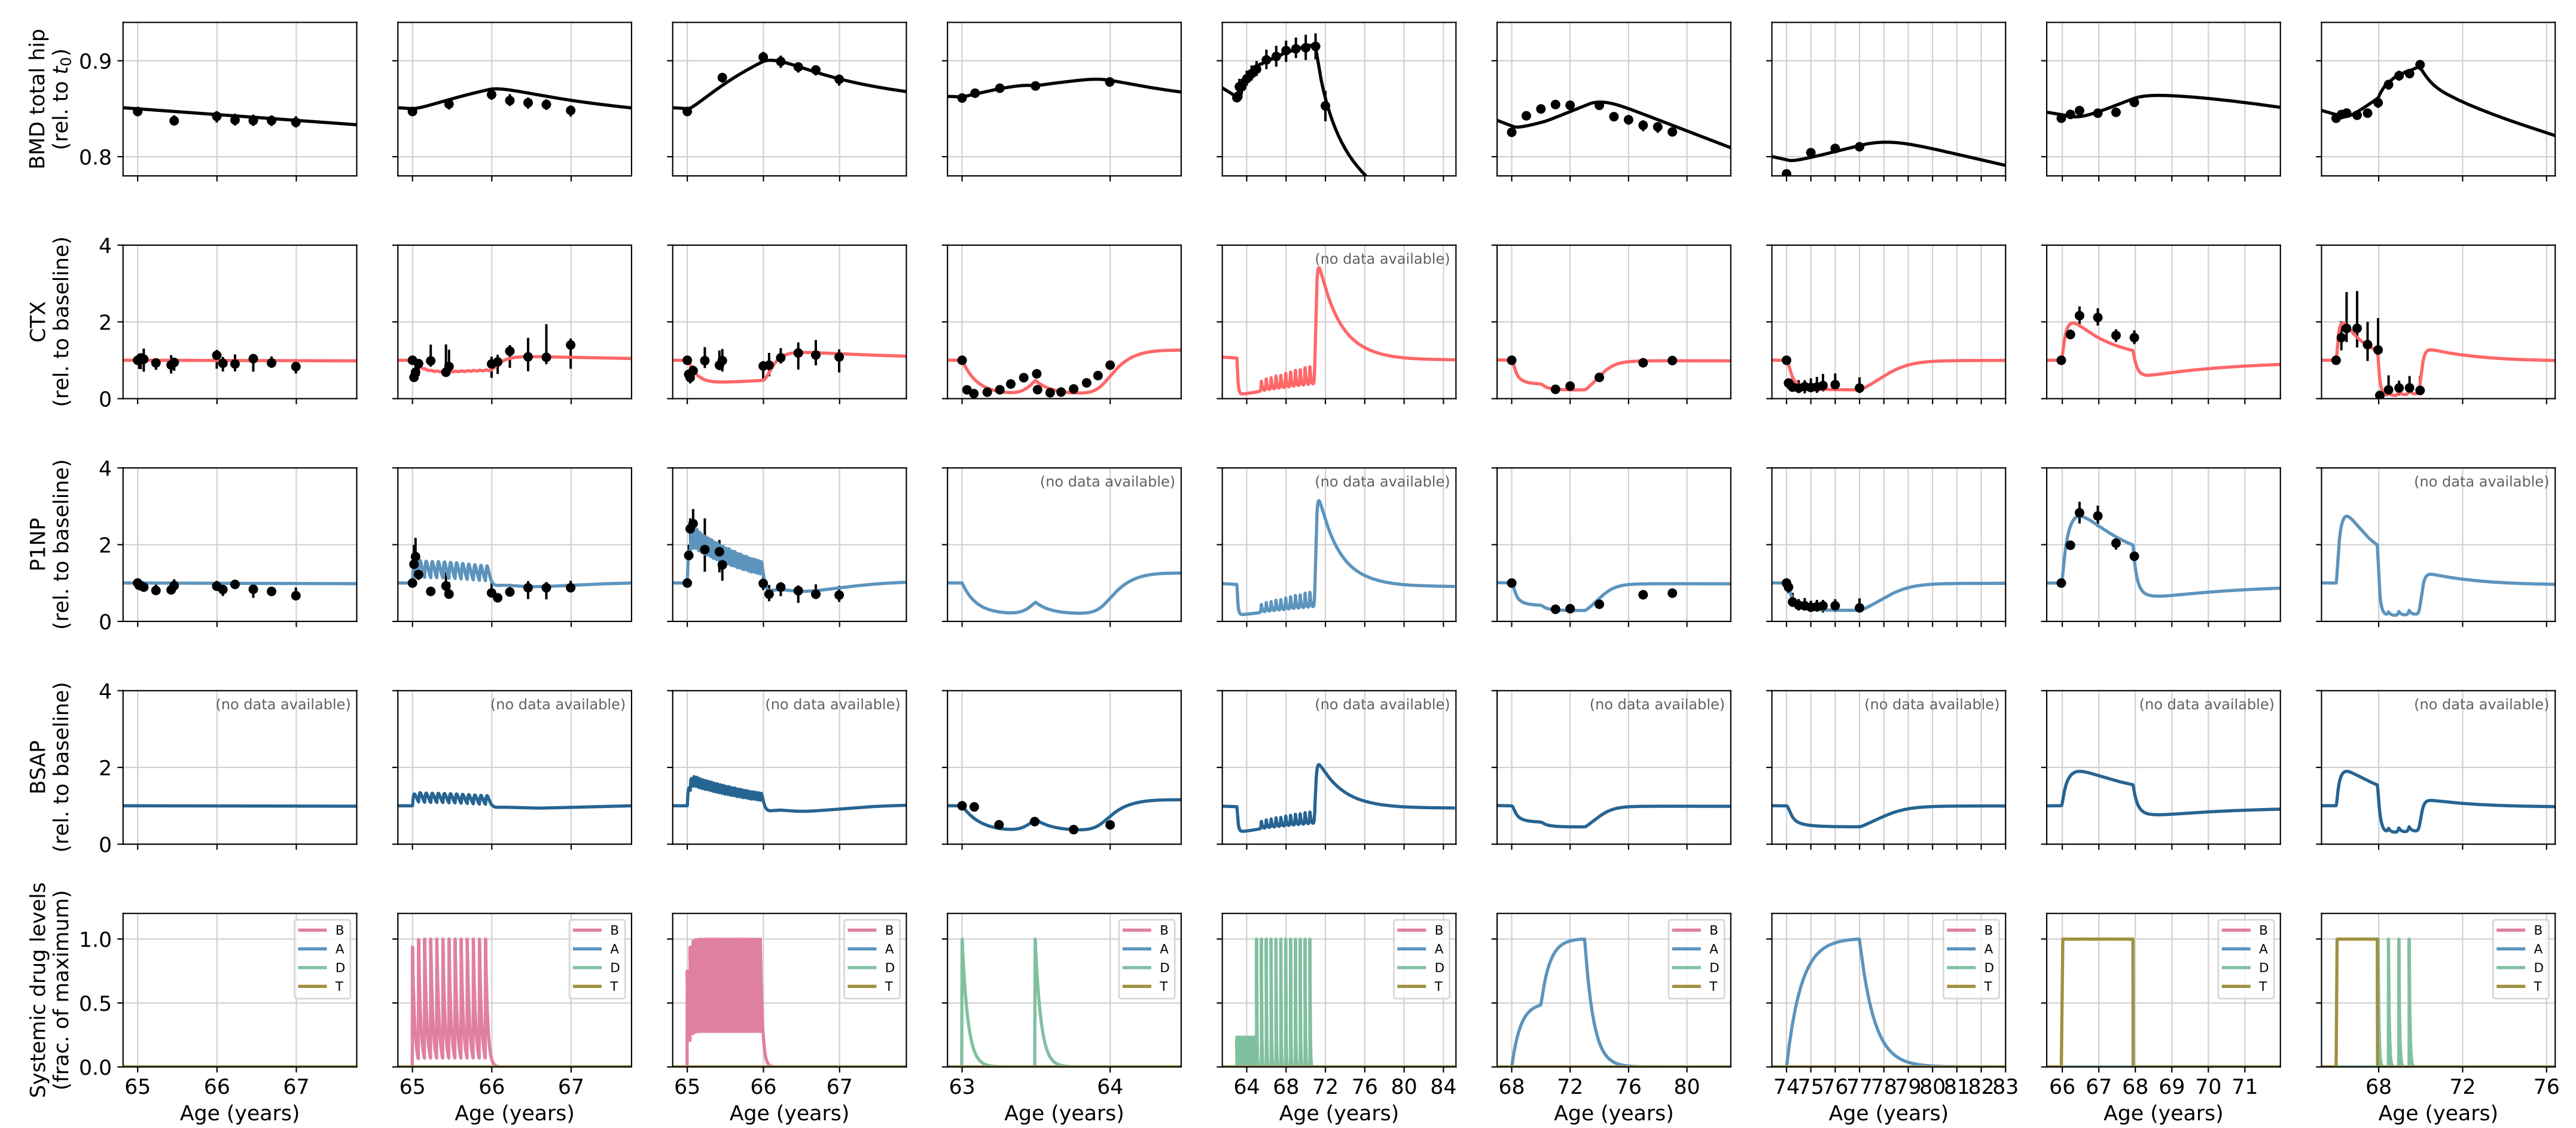

Supplement: code1 [file elife-76228-code1-v1.zip]
